# Supplementary material for: Correction: Assessing Mitochondrial DNA Variation and Copy Number in Lymphocytes of ~2,000 Sardinians Using Tailored Sequencing Analysis Tools
Source: PLoS Genet. 2015 Sep 29;11(9):e1005549. doi: 10.1371/journal.pgen.1005549 (PMC4587968; doi:10.1371/journal.pgen.1005549)
Supplement: S1 Table — (XLSX) [file pgen.1005549.s001.xlsx]

## Sheet: TableS1_Homos_new.txt
Position	Reference	Genotype	Number_of_observations_in_population
57	T	C	3
59	T	C	28
62	G	T	4
64	C	T	41
72	T	G	1
72	T	C	159
73	A	G	1015
93	A	G	235
95	A	T	35
95	A	C	25
103	G	A	3
114	C	T	23
143	G	A	2
146	T	C	100
150	C	T	147
151	C	T	1
152	T	C	311
153	A	G	22
182	C	T	2
185	G	A	89
186	C	A	1
188	A	G	43
189	A	G	10
194	C	T	1
195	T	C	198
195	T	A	1
198	C	T	5
199	T	C	105
200	A	G	7
204	T	C	43
207	G	A	10
215	A	G	77
217	T	C	31
225	G	A	17
226	T	C	5
227	A	G	8
228	G	A	94
235	A	G	2
236	T	C	1
239	T	C	2
240	A	G	1
247	G	A	1
250	T	C	33
263	A	G	2016
272	A	G	28
279	T	C	74
284	A	G	9
285	C	T	5
295	C	T	372
318	T	C	1
319	T	C	81
325	C	T	28
335	A	G	2
337	A	C	19
373	A	G	61
374	A	G	7
385	A	G	37
437	C	T	8
449	T	C	2
456	C	T	8
462	C	T	108
480	T	C	17
482	T	C	2
485	T	C	2
489	T	C	384
497	C	T	56
499	G	A	4
501	C	T	2
502	C	T	5
508	A	G	32
513	G	A	79
532	A	G	2
571	C	T	40
663	A	G	7
680	T	C	2
709	G	A	274
714	A	G	1
722	C	T	2
750	A	G	2011
769	G	A	1
813	A	G	10
825	T	A	1
867	C	T	2
930	G	A	58
951	G	A	1
980	T	C	4
1009	C	T	2
1018	G	A	1
1019	A	G	4
1040	T	C	38
1048	C	T	1
1118	A	G	1
1154	A	T	30
1189	T	C	130
1243	T	C	6
1290	C	T	15
1313	A	G	19
1352	C	A	2
1406	T	C	1
1420	T	C	1
1438	A	G	2003
1598	G	A	1
1607	T	C	1
1694	T	C	2
1700	T	C	2
1703	C	T	1
1719	G	A	62
1721	C	T	2
1736	A	G	2
1811	A	G	168
1819	T	C	3
1822	T	C	1
1888	G	A	168
1888	G	C	1
2159	T	C	2
2217	C	T	5
2218	C	T	5
2245	A	G	1
2259	C	T	2
2280	C	T	2
2284	C	A	2
2294	A	G	4
2416	T	C	1
2483	T	C	2
2486	T	C	2
2639	C	T	1
2706	A	G	1135
2758	G	A	1
2772	C	T	2
2789	C	T	1
2851	A	G	20
2880	A	G	1
2885	T	C	1
2955	T	C	3
3010	G	A	444
3105	A	G	3
3197	T	C	126
3204	C	T	2
3321	C	T	1
3348	A	G	3
3357	G	A	1
3375	C	T	7
3394	T	C	2
3397	A	G	1
3432	C	T	1
3447	A	G	1
3480	A	G	138
3498	C	T	62
3505	A	G	5
3516	C	A	1
3519	C	T	1
3523	A	G	1
3591	G	A	69
3594	C	T	1
3615	A	G	49
3627	C	T	3
3672	A	G	2
3705	G	A	12
3720	A	G	31
3741	C	T	1
3745	G	A	3
3803	T	G	2
3849	G	A	1
3865	A	G	30
3866	T	C	1
3867	C	T	1
3892	A	G	7
3903	C	T	1
3918	G	A	2
3921	C	A	1
3990	C	T	1
3992	C	T	15
4008	A	G	1
4011	C	T	1
4024	A	G	15
4025	C	T	3
4104	A	G	1
4113	G	A	1
4216	T	C	556
4227	A	G	14
4248	T	C	3
4295	A	G	2
4312	C	T	1
4314	T	C	33
4336	T	C	5
4454	T	C	1
4491	G	A	1
4529	A	T	35
4541	G	A	1
4553	T	C	1
4560	G	A	1
4561	T	C	1
4580	G	A	64
4586	T	C	1
4646	T	C	2
4655	G	A	81
4674	A	G	1
4688	T	C	14
4703	T	C	6
4735	C	A	1
4745	A	G	2
4766	A	G	2
4769	A	G	1979
4793	A	G	2
4796	C	T	1
4823	T	C	1
4824	A	G	1
4853	G	A	34
4859	T	C	2
4917	A	G	171
4936	C	T	2
4958	A	G	2
4960	C	T	1
4973	T	C	2
4991	G	A	9
4997	C	T	2
5004	T	C	11
5046	G	A	5
5054	G	A	2
5074	T	C	28
5081	T	C	1
5096	T	C	1
5130	T	C	1
5147	G	A	44
5165	C	T	1
5186	A	G	2
5187	C	T	69
5231	G	A	6
5234	C	T	1
5249	T	C	68
5250	T	C	2
5262	G	A	1
5295	C	T	3
5301	A	G	4
5319	A	G	9
5360	C	T	1
5390	A	G	32
5426	T	C	32
5442	T	C	1
5460	G	A	47
5471	G	A	68
5474	A	G	2
5495	T	C	2
5580	T	C	2
5601	C	T	5
5603	C	T	1
5633	C	T	182
5634	A	G	1
5655	T	C	8
5656	A	G	105
5788	T	C	1
5839	C	T	3
5911	C	T	1
5957	A	G	2
5964	T	C	64
5985	G	A	2
5999	T	C	2
6026	G	A	5
6040	A	G	3
6045	C	T	32
6047	A	G	2
6113	A	G	2
6125	A	G	1
6152	T	C	31
6164	C	T	7
6173	C	T	20
6185	T	C	1
6216	T	C	4
6221	T	C	24
6260	G	A	4
6261	G	A	57
6284	A	G	2
6285	G	A	61
6296	C	T	1
6296	C	A	1
6366	G	C	5
6371	C	T	21
6425	T	C	1
6446	G	A	10
6465	G	A	6
6491	C	T	105
6518	C	T	4
6635	T	C	28
6659	A	G	1
6671	T	C	8
6674	T	C	52
6680	T	C	8
6734	G	A	1
6776	T	C	403
6791	A	G	2
6866	T	C	1
6887	C	T	2
6915	G	A	1
6953	A	G	2
6965	T	G	1
6973	T	C	74
7028	C	T	1146
7051	T	C	1
7055	A	G	2
7077	G	A	1
7083	A	G	6
7098	C	T	2
7146	A	G	1
7184	A	G	4
7205	C	T	1
7226	G	A	50
7235	C	T	64
7235	C	A	1
7247	C	T	1
7283	T	C	2
7299	A	G	2
7310	T	C	5
7334	T	C	2
7337	G	A	3
7353	A	G	1
7356	G	A	10
7385	A	G	1
7403	A	G	6
7418	C	T	1
7427	C	T	1
7468	C	T	75
7476	C	T	246
7521	G	A	13
7543	A	G	30
7570	A	G	9
7571	A	C	9
7581	T	C	6
7624	T	C	1
7645	T	C	2
7679	T	C	67
7702	G	A	5
7705	T	C	2
7718	A	G	1
7768	A	G	115
7789	G	A	79
7805	G	A	3
7813	C	T	6
7852	G	A	39
7853	G	A	13
7861	T	C	1
7864	C	T	1
7873	C	T	66
7897	G	A	4
7918	C	A	1
7999	T	C	2
8005	T	C	2
8014	A	T	2
8027	G	A	3
8108	A	G	1
8119	T	C	1
8137	C	T	1
8149	A	G	2
8158	A	G	1
8251	G	A	37
8260	T	A	92
8269	G	A	4
8270	C	T	32
8279	T	C	5
8280	A	G	3
8282	C	T	7
8290	G	A	4
8291	A	G	1
8374	A	G	1
8380	T	C	1
8393	C	T	5
8428	C	T	1
8433	T	C	1
8463	A	G	12
8468	C	T	1
8472	C	T	1
8473	T	C	1
8478	C	T	2
8503	T	C	2
8512	A	G	4
8522	C	T	7
8538	T	C	52
8557	G	A	2
8566	A	G	3
8572	G	A	2
8580	C	A	2
8581	G	A	2
8602	T	C	6
8603	T	C	100
8614	T	C	1
8616	G	T	1
8655	C	T	1
8659	A	G	26
8684	C	T	1
8697	G	A	166
8701	A	G	14
8712	C	T	4
8742	A	G	30
8764	G	A	2
8790	G	A	30
8794	C	T	2
8817	A	G	1
8836	A	G	1
8853	A	G	2
8860	A	G	2002
8862	A	T	2
8895	T	C	5
8921	G	A	1
8922	C	T	2
8937	T	C	18
8943	C	T	2
8950	G	A	2
8987	T	C	2
8994	G	A	6
9007	A	G	4
9017	T	C	6
9025	G	A	1
9033	A	G	4
9042	C	T	1
9053	G	A	1
9055	G	A	136
9064	G	A	51
9088	T	C	3
9098	T	C	5
9123	G	A	13
9128	T	C	3
9151	A	G	4
9152	T	C	1
9156	A	G	2
9163	G	A	57
9178	G	A	2
9180	A	G	1
9266	G	A	4
9305	G	A	1
9311	T	C	1
9335	C	A	2
9347	A	G	1
9368	A	G	2
9386	T	C	2
9477	G	A	127
9512	C	T	37
9540	T	C	13
9548	G	A	1
9676	A	G	2
9698	T	C	145
9716	T	C	6
9755	G	A	1
9770	T	C	2
9818	C	T	1
9839	C	T	19
9842	A	G	1
9899	T	C	2
9923	C	T	5
9938	T	C	14
9947	G	A	2
9966	G	A	10
10034	T	C	35
10042	A	T	14
10044	A	G	3
10084	T	C	79
10142	C	T	1
10172	G	A	184
10202	C	T	1
10211	C	T	96
10217	A	G	2
10238	T	C	34
10248	T	C	2
10250	A	G	2
10286	A	G	67
10301	A	G	1
10352	A	G	2
10373	G	A	1
10376	A	G	1
10398	A	G	546
10400	C	T	12
10463	T	C	160
10493	T	C	2
10499	A	G	77
10506	A	G	4
10535	T	C	4
10550	A	G	138
10556	C	T	1
10580	A	G	32
10589	G	A	2
10619	C	T	33
10664	C	T	1
10688	G	A	1
10707	T	G	1
10750	A	G	37
10810	T	C	2
10822	C	T	64
10873	T	C	12
10876	A	G	31
10907	T	C	6
10915	T	C	2
10927	T	C	1
10993	G	A	1
11016	G	A	32
11025	T	C	6
11116	T	C	6
11167	A	G	2
11176	G	A	1
11177	C	T	51
11200	A	G	24
11204	T	C	2
11251	A	G	530
11254	T	C	7
11278	A	C	4
11299	T	C	130
11332	C	T	2
11337	A	G	2
11339	T	C	2
11377	G	A	80
11386	T	C	2
11407	C	A	2
11447	G	A	29
11467	A	G	313
11485	T	C	4
11590	A	G	1
11620	A	G	2
11641	A	G	1
11647	C	T	20
11653	A	G	2
11674	C	T	13
11719	G	A	950
11776	T	C	3
11779	C	T	1
11812	A	G	130
11840	C	T	4
11878	T	C	2
11893	A	G	2
11908	A	G	1
11914	G	A	34
11928	A	G	1
11929	T	C	75
11947	A	G	5
11950	A	G	46
12007	G	A	2
12026	A	G	1
12033	A	G	2
12040	A	G	7
12059	A	C	13
12092	C	T	1
12123	C	T	2
12127	G	A	5
12308	A	G	315
12346	C	T	12
12358	A	G	20
12362	C	T	4
12369	C	T	4
12370	C	T	1
12372	G	A	299
12397	A	G	7
12403	C	T	11
12414	T	C	7
12425	A	G	2
12441	T	C	1
12465	C	T	2
12471	T	C	1
12501	G	A	21
12549	C	T	1
12558	C	T	2
12609	T	C	1
12612	A	G	149
12630	G	A	1
12633	C	A	14
12634	A	G	1
12662	A	G	23
12696	T	C	1
12705	C	T	79
12810	A	G	17
12864	T	C	1
12879	T	C	5
12921	A	G	1
12950	A	C	7
12984	C	T	3
13020	T	C	20
13095	T	C	1
13104	A	G	5
13105	A	G	7
13135	G	A	2
13145	G	A	64
13161	T	C	2
13215	T	C	2
13276	A	G	1
13326	T	C	2
13368	G	A	165
13413	A	G	2
13506	C	T	1
13518	C	T	2
13527	A	G	5
13535	A	G	3
13563	A	G	1
13617	T	C	127
13630	A	G	2
13637	A	G	2
13650	C	T	1
13651	A	G	4
13651	A	C	2
13656	T	C	6
13674	T	C	2
13677	C	T	2
13680	C	T	2
13692	C	T	2
13708	G	A	373
13710	A	G	1
13722	A	G	79
13734	T	C	31
13740	T	C	4
13743	T	C	1
13753	T	C	73
13758	C	T	30
13759	G	A	3
13780	A	G	36
13781	T	C	2
13807	C	T	19
13827	A	G	1
13863	C	T	1
13907	A	G	2
13928	G	C	3
13932	C	T	5
13934	C	T	106
13938	C	T	3
13966	A	G	23
14002	A	G	1
14020	T	C	1
14037	A	G	5
14053	A	G	60
14070	A	G	6
14085	A	G	6
14110	T	C	12
14118	A	G	2
14133	A	G	80
14139	A	G	4
14167	C	T	128
14179	A	G	3
14180	T	C	6
14182	T	C	117
14193	A	G	2
14233	A	G	164
14287	T	C	2
14308	T	C	1
14325	T	C	1
14329	C	T	60
14353	T	C	2
14364	G	A	6
14365	C	T	13
14410	G	A	2
14470	T	C	61
14470	T	A	4
14484	T	C	2
14530	T	C	2
14560	G	A	2
14569	G	A	1
14581	T	C	1
14582	A	G	14
14587	A	G	13
14620	C	T	2
14629	C	T	2
14766	C	T	950
14769	A	G	11
14783	T	C	12
14788	T	C	1
14790	A	G	3
14791	C	T	4
14793	A	G	5
14798	T	C	294
14800	C	A	5
14818	A	C	4
14818	A	G	5
14821	C	T	2
14869	G	A	5
14872	C	T	2
14905	G	A	156
14947	C	T	39
14971	T	C	1
14981	A	C	1
15002	G	A	1
15010	A	G	1
15043	G	A	46
15071	T	C	11
15115	T	C	5
15136	C	T	1
15148	G	A	5
15217	G	A	8
15218	A	G	6
15244	A	G	5
15257	G	A	254
15289	T	C	27
15301	G	A	11
15310	T	C	2
15313	T	C	2
15314	G	A	19
15315	C	T	170
15317	G	A	1
15319	C	T	3
15326	A	G	2020
15346	G	A	8
15394	T	C	3
15430	C	T	2
15431	G	A	1
15452	C	A	527
15454	T	C	34
15519	T	C	1
15533	A	G	1
15538	C	T	2
15553	G	A	1
15568	C	T	1
15607	A	G	163
15646	C	T	1
15670	T	C	1
15693	T	C	2
15703	A	T	2
15732	C	T	30
15772	A	T	2
15773	G	A	1
15777	G	A	60
15784	T	C	66
15787	T	C	2
15812	G	A	174
15814	A	G	18
15833	C	T	2
15856	C	T	1
15883	G	A	2
15884	G	C	6
15884	G	A	2
15900	T	C	2
15904	C	T	114
15907	A	G	31
15924	A	G	37
15927	G	A	4
15928	G	A	164
15930	G	A	4
15954	A	C	5
16042	G	A	7
16051	A	G	31
16065	G	A	19
16066	A	G	2
16067	C	T	61
16069	C	T	365
16074	A	G	1
16086	T	C	52
16093	T	C	9
16111	C	T	5
16114	C	T	1
16114	C	A	1
16126	T	C	497
16129	G	A	73
16129	G	C	32
16145	G	A	86
16147	C	T	1
16148	C	T	30
16153	G	A	7
16162	A	G	3
16163	A	G	28
16166	A	G	2
16167	C	T	53
16168	C	T	1
16169	C	A	45
16172	T	C	5
16175	A	G	1
16176	C	A	1
16179	C	T	7
16183	A	C	2
16188	C	T	27
16189	T	C	67
16192	C	T	46
16193	C	T	151
16209	T	C	3
16213	G	A	3
16218	C	T	3
16219	A	G	3
16223	C	T	71
16224	T	C	117
16230	A	G	1
16231	T	C	62
16234	C	T	1
16235	A	G	23
16239	C	T	2
16240	A	G	8
16243	T	C	1
16245	C	T	2
16249	T	C	17
16255	G	A	15
16256	C	T	9
16257	C	T	1
16260	C	T	9
16261	C	T	67
16265	A	G	1
16265	A	C	1
16266	C	T	1
16269	A	G	12
16270	C	T	94
16274	G	A	6
16278	C	T	210
16286	C	T	1
16288	T	C	12
16289	A	G	6
16290	C	T	6
16291	C	T	135
16292	C	T	108
16293	A	G	18
16294	C	T	172
16295	C	T	2
16296	C	T	27
16298	T	C	75
16298	T	G	1
16302	A	G	1
16304	T	C	38
16305	A	G	15
16310	G	A	2
16311	T	C	354
16318	A	G	1
16319	G	A	2
16320	C	T	7
16324	T	C	28
16325	T	C	1
16327	C	T	1
16343	A	G	4
16352	T	C	1
16354	C	T	2
16356	T	C	85
16357	T	C	1
16359	T	C	12
16362	T	C	88
16368	T	C	18
16390	G	A	6
16391	G	A	21
16399	A	G	5
16465	C	T	10
16497	A	G	1
16519	T	C	1349
16524	A	C	2
16525	A	G	1
16527	C	T	1
